# Supplementary material
Source: PubMed Central journal article supplement (PMC2528123)
Supplement: pp.108.119222_1.pdf [file pp.108.119222_1.pdf]

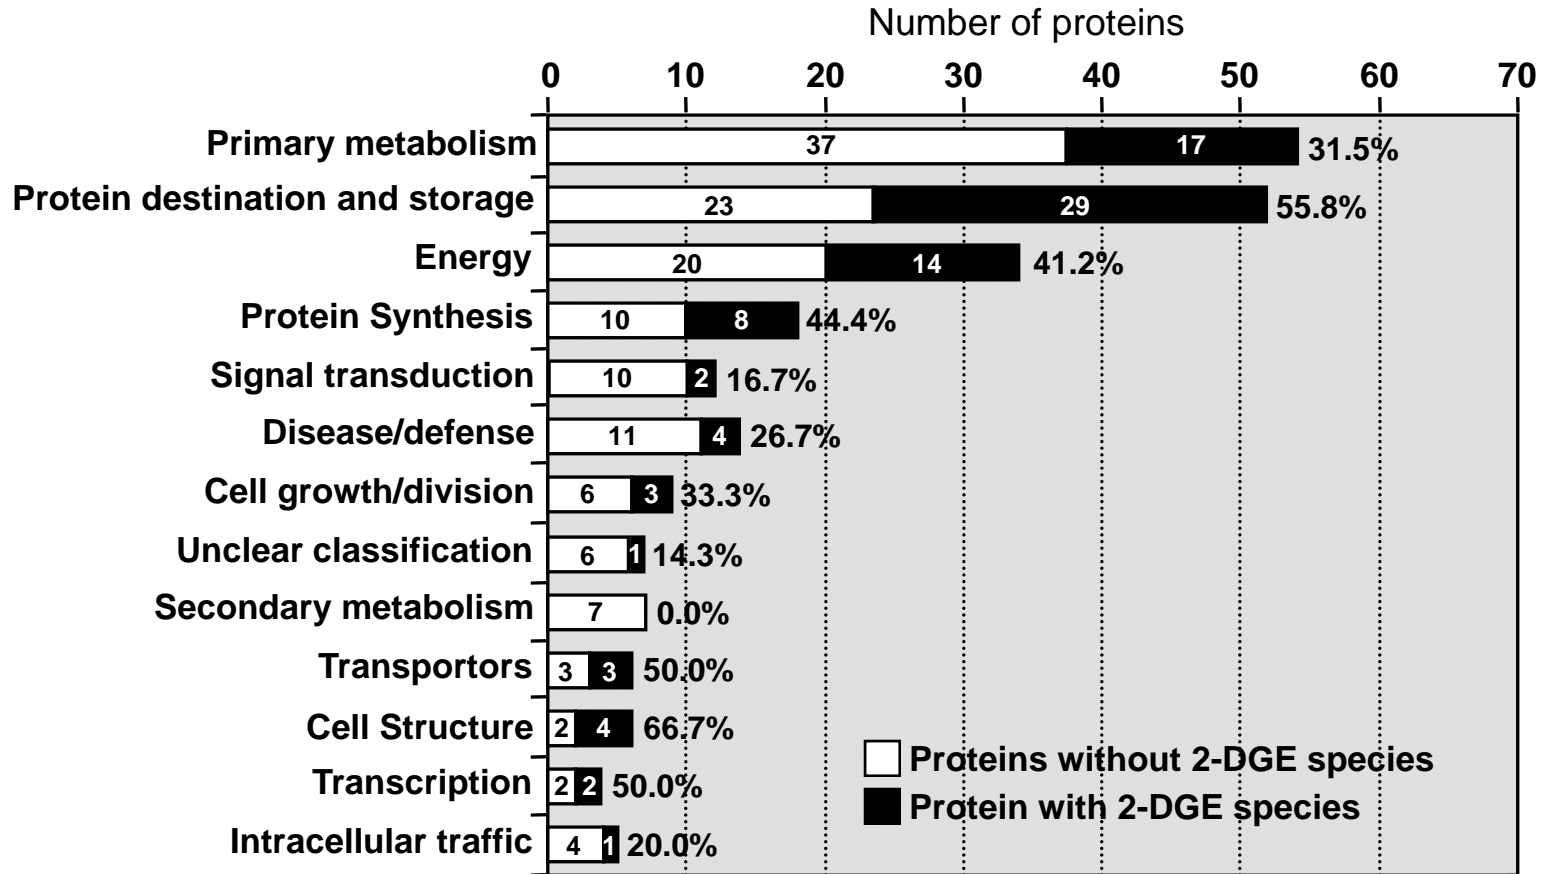

**Figure S1.** Distribution of soybean proteins without and with 2-DGES according to their main functional categories. Soybean proteins identified by 2-DGE in combination with nESI-LC-MS/MS were used for analyzing proteins with 2-DGES as per their main functional classification. Total number of NR proteins without (white bars) and with (black bars) 2-DGES is mentioned inside each column. The percentage of proteins with 2-DGES is at the top of each functional category.
