# Supplementary material
Source: PubMed Central journal article supplement (PMC2528123)
Supplement: pp.108.119222_3.pdf [file pp.108.119222_3.pdf]

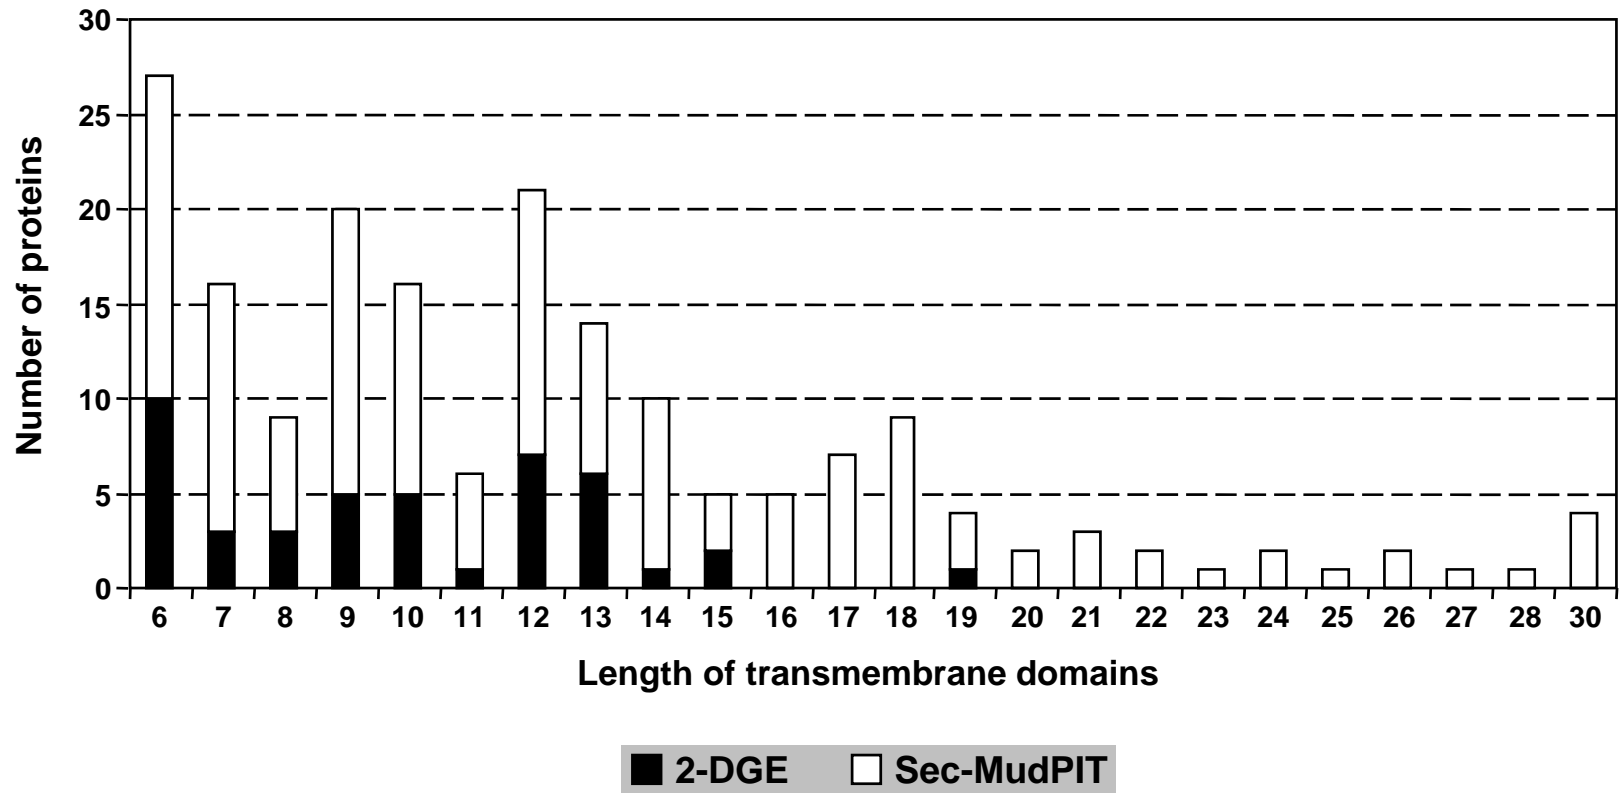

**Figure S3.** Length of TMD identified in proteins as determined by the THUMBUP method. The TMD length is the maximum amino acid number of TMD identified in a given protein.
